# Supplementary material for: Synthesis and serum protein binding of novel ring-substituted harmine derivatives
Source: Royal Society of Chemistry journal article supplement (doi:10.1039/c5ra06426k), 2015-01-01
Supplement: c5ra06426k1.pdf [file c5ra06426k1.pdf]

*Supplementary Information*

| Compound  | Substituents                                                                       |                                                                                      | $pK_a$<br>(25 °C) |
|-----------|------------------------------------------------------------------------------------|--------------------------------------------------------------------------------------|-------------------|
|           | -R <sub>7</sub>                                                                    | -R <sub>9</sub>                                                                      |                   |
| Harmine   |   | H                                                                                    | 6.15              |
| <b>1</b>  |   | H                                                                                    | 6.15              |
| <b>2a</b> |   | H                                                                                    | 6.15              |
| <b>2b</b> |   | H                                                                                    | 6.15              |
| <b>3</b>  |   | H                                                                                    | 6.15              |
| <b>4</b>  |  | H                                                                                    | 6.15              |
| <b>5</b>  | Me                                                                                 |  | 6.09              |
| <b>6</b>  | Me                                                                                 |  | 6.09              |
| <b>7</b>  | Me                                                                                 |  | 6.09              |
| <b>8a</b> | Me                                                                                 |  | 6.08              |
| <b>8b</b> | Me                                                                                 |  | 6.08              |
| <b>9</b>  | Me                                                                                 |  | 6.10              |

### **Supplementary Table 1**

The  $pK_a$  values of harmine and its synthetic derivatives predicted with MarvinSketch version 6.3.0 (ChemAxon).
